# Supplementary material for: RbBaPO4:Eu2+: a new alternative blue-emitting phosphor for UV-based white light-emitting diodes
Source: Royal Society of Chemistry journal article supplement (doi:10.1039/c2tc00162d), 2012-10-24
Supplement: c2tc00162d.pdf [file c2tc00162d.pdf]

Page S1

Electronic Supplementary Information (ESI)

## **RbBaPO<sub>4</sub>:Eu<sup>2+</sup>: A new alternative blue-emitting phosphor for UV- Based white light-emitting diodes**

Hee Jo Song,<sup>a,†</sup> Dong Kyun Yim,<sup>a,†</sup> Hee-Suk Roh,<sup>a</sup> In Sun Cho,<sup>b</sup> Seung-Joo Kim,<sup>c</sup> Yun-Ho Jin,<sup>d</sup> Hyun-Woo Shim,<sup>d</sup> Dong-Wan Kim<sup>\*,d</sup> and Kug Sun Hong<sup>\*,a</sup>

<sup>a</sup> Department of Materials Science and Engineering, College of Engineering, Seoul National University, Seoul 151-744, Republic of Korea

<sup>b</sup> Department of Mechanical Engineering, Stanford University, California 94305, USA

<sup>c</sup> Department of Chemistry, Division of Energy Systems Research, Ajou University, Suwon 443-749, Republic of Korea

<sup>d</sup> Department of Materials Science and Engineering, Ajou University, Suwon 443-749, Republic of Korea

\*To whom correspondence should be addressed. E-mail: [dwkim@ajou.ac.kr](mailto:dwkim@ajou.ac.kr) and [kshongss@plaza.snu.ac.kr](mailto:kshongss@plaza.snu.ac.kr)

**Table S1.** CIE chromaticity coordinates of the RBP, BAM and SMS phosphor in the range from 300 to 380 nm.

| Excitation<br>(nm) | RbBaPO <sub>4</sub> :Eu <sup>2+</sup> |            | BaMgAl <sub>10</sub> O <sub>17</sub> :Eu <sup>2+</sup> |            | Sr <sub>3</sub> MgSi <sub>2</sub> O <sub>8</sub> :Eu <sup>2+</sup> |            |
|--------------------|---------------------------------------|------------|--------------------------------------------------------|------------|--------------------------------------------------------------------|------------|
|                    | CIE                                   | CIE        | CIE                                                    | CIE        | CIE                                                                | CIE        |
|                    | coordinate                            | coordinate | coordinate                                             | coordinate | coordinate                                                         | coordinate |
|                    | x                                     | y          | x                                                      | y          | x                                                                  | y          |
| 300                | 0.1552                                | 0.0421     | 0.1476                                                 | 0.0548     | 0.1387                                                             | 0.0687     |
| 310                | 0.1552                                | 0.0420     | 0.1478                                                 | 0.0545     | 0.1387                                                             | 0.0690     |
| 320                | 0.1553                                | 0.0422     | 0.1475                                                 | 0.0548     | 0.1387                                                             | 0.0692     |
| 330                | 0.1552                                | 0.0423     | 0.1477                                                 | 0.0561     | 0.1388                                                             | 0.0693     |
| 340                | 0.1552                                | 0.0423     | 0.1475                                                 | 0.0569     | 0.1388                                                             | 0.0692     |
| 350                | 0.1552                                | 0.0424     | 0.1473                                                 | 0.0591     | 0.1388                                                             | 0.0694     |
| 360                | 0.1552                                | 0.0424     | 0.1471                                                 | 0.0600     | 0.1387                                                             | 0.0700     |
| 370                | 0.1551                                | 0.0424     | 0.1470                                                 | 0.0605     | 0.1389                                                             | 0.0698     |
| 380                | 0.1552                                | 0.0425     | 0.1473                                                 | 0.0611     | 0.1389                                                             | 0.0698     |
